# Supplementary material for: Analysis of Immune Checkpoint Drug Targets and Tumor Proteotypes in Non-Small Cell Lung Cancer
Source: PubMed Central journal article supplement (PMC7300007; doi:10.1038/s41598-020-66902-0), 2020-06-17
Supplement: 41598_2020_66902_MOESM4_ESM.pdf [file 41598_2020_66902_MOESM4_ESM.pdf]

# Analysis of Immune Checkpoint Drug Targets and Tumor Proteotypes in Non-Small Cell Lung Cancer

Daniel C. Liebler<sup>1\*</sup>, Timothy R. Holzer<sup>2</sup>, Alexander Haragan<sup>3</sup>, Ryan D. Morrison<sup>1</sup>, Leslie O'Neill Reising<sup>2</sup>, Bradley L. Ackermann<sup>2</sup>, Jeff A. Fill<sup>2</sup>, Andrew E. Schade<sup>2</sup>, and Aaron M. Gruver<sup>2\*</sup>

<sup>1</sup>Protypia, Inc, Nashville, TN, USA

<sup>2</sup>Lilly Research Laboratories, Eli Lilly and Company, Indianapolis, IN, USA

<sup>3</sup>Institute of Translational Medicine, University of Liverpool, Liverpool, UK

## **SUPPLEMENTARY FIGURES**

**Figure S1.**

**Figure S2.**

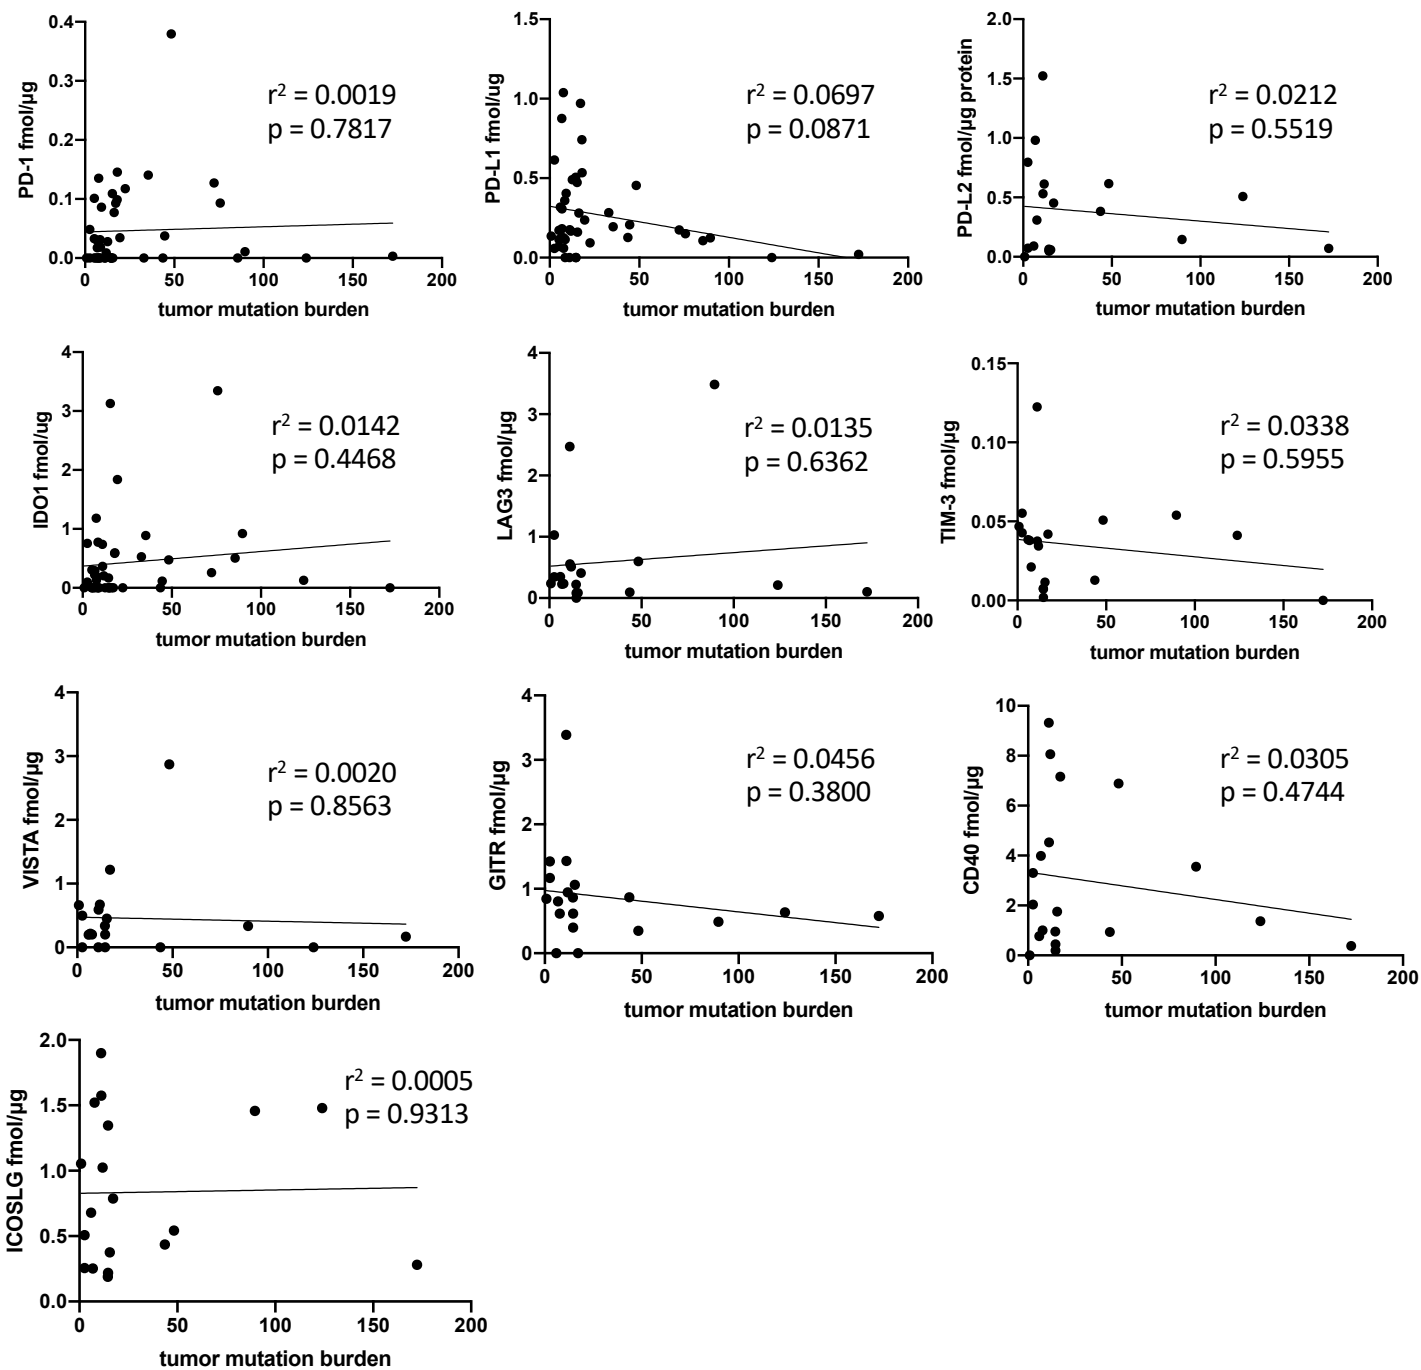

**Figure S1.** Correlation of MS protein with TMB for PD-1, PD-L1, IDO1 in the 46 sample NSCLC cohort and for PD-L2, LAG3, TIM3, ICOSLG, GITR, VISTA and CD40 in the 20 sample subcohort.

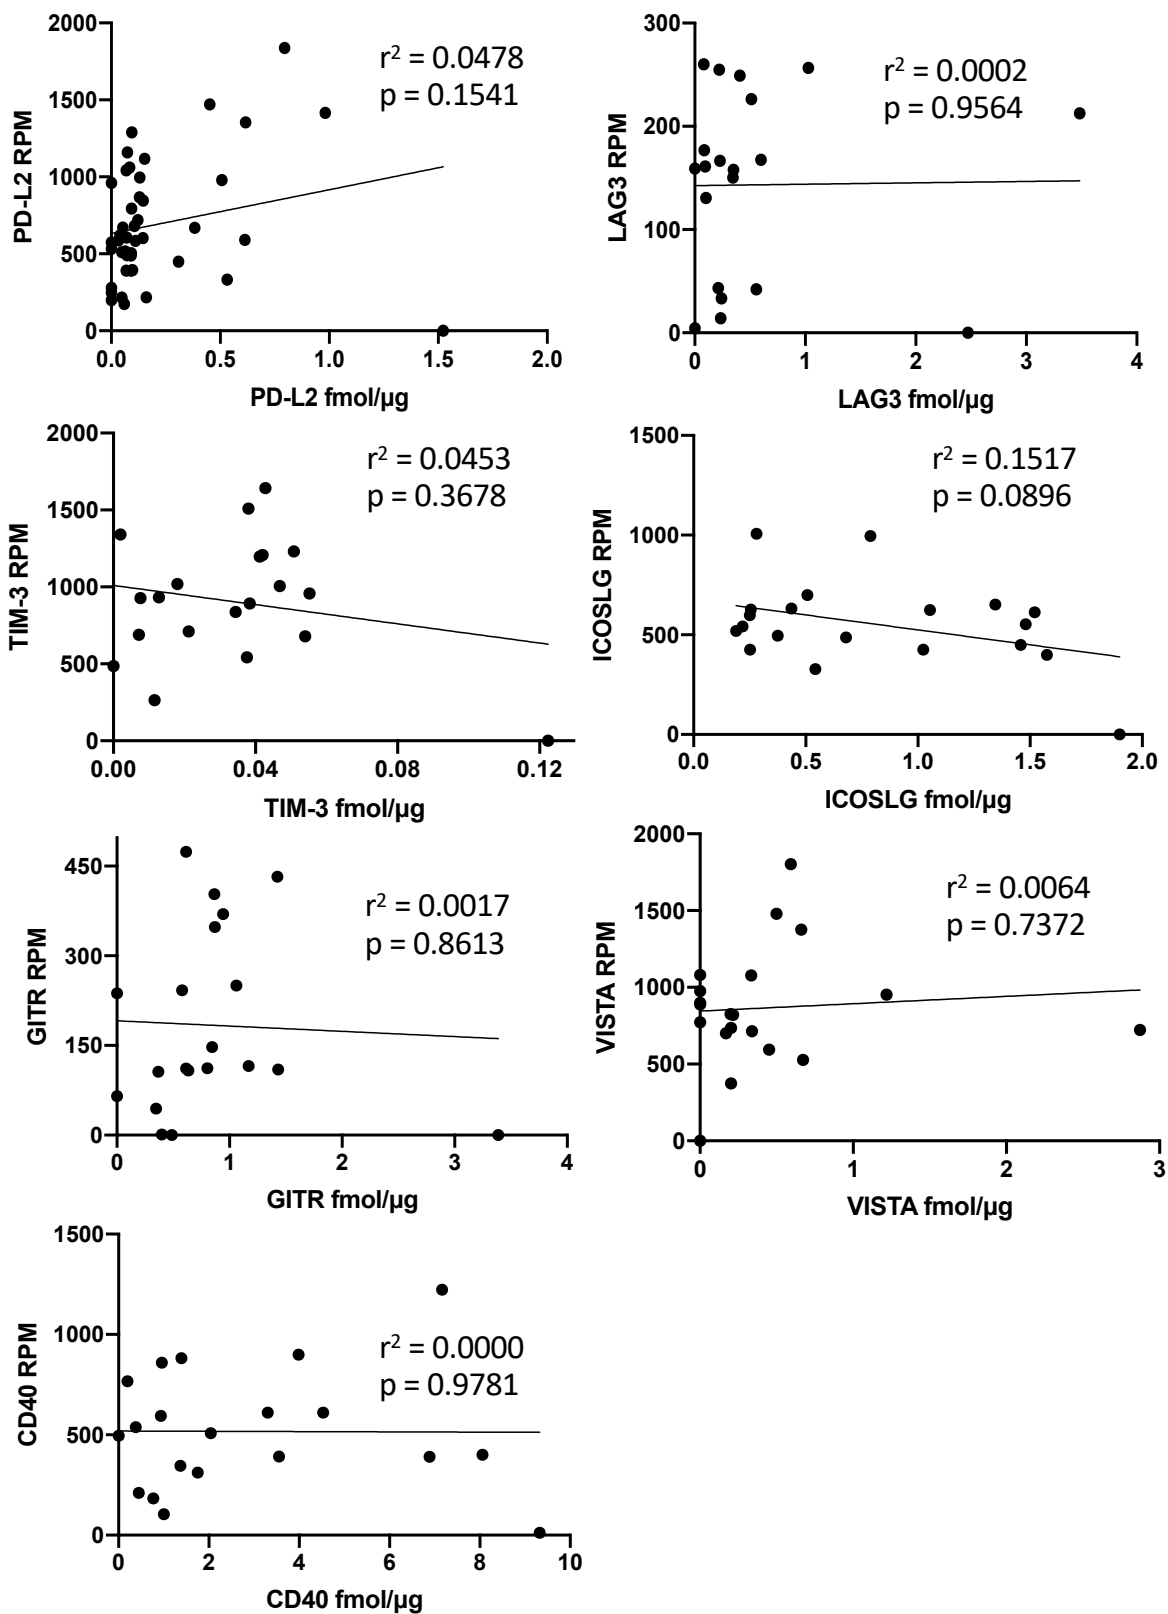

**Figure S2.** Correlation of MS protein with mRNA expression for PD-L2, LAG3, TIM3, ICOSLG, GITR, VISTA and CD40 in the 20 sample NSCLC subcohort.
